# Supplementary material for: An unprecedented organic–inorganic hybrid material with an I3O3 framework based on cadmium hydroxide and in situ generated 1H-tetrazolate-5-acetic acid
Source: Royal Society of Chemistry journal article supplement (doi:10.1039/c5ce01347j), 2015-01-01

**Electronic Supplementary Information (ESI)**

**An unprecedented organic-inorganic hybrid material with the  $I^3O^3$  framework based on cadmium hydroxide and in situ generated 1*H*-tetrazolate-5-acetic acid**

Mei-Feng Wu,<sup>\*ab</sup> Ting-Ting Shen,<sup>a</sup> Shuai He,<sup>a</sup> Ke-Qin Wu,<sup>a</sup> Shuai-Hua Wang,<sup>b</sup> Zhi-Fa Liu,<sup>b</sup>  
Fa-Kun Zheng,<sup>\*b</sup> and Guo-Cong Guo<sup>b</sup>

<sup>a</sup> *School of Environmental and Chemical Engineering, Nanchang Hangkong University, Nanchang, Jiangxi 330063, PR China*

<sup>b</sup> *State Key Laboratory of Structural Chemistry, Fujian Institute of Research on the Structure of Matter, Chinese Academy of Sciences, Fuzhou, Fujian 350002, PR China*

E-mail: [wumeifeng2008dx@163.com](mailto:wumeifeng2008dx@163.com), [zfk@fjirsm.ac.cn](mailto:zfk@fjirsm.ac.cn); Fax: +86 79183953373.

## Materials and instruments

All chemicals were commercially available sources of analytical grade and used without further purification. The elemental analyses were performed on an Elementar Vario EL III microanalyzer. The FT-IR spectra were obtained on a Perkin-Elmer Spectrum using KBr disks in the range 4000–400  $\text{cm}^{-1}$ . Photoluminescent analysis was performed on an Edinburgh EI920 fluorescence spectrometer with a 450-W Xe lamp and a R928P PMT detector. A 399-nm high-pass filter was applied when performing PL determinations. Thermogravimetric analysis (TGA) experiment was made on a METTLER TOLEDO TGA/DSC1 thermogravimetric analyzer under  $\text{N}_2$  atmosphere with the sample heated in an  $\text{Al}_2\text{O}_3$  crucible at a heating rate of 10  $\text{K min}^{-1}$ . Powder X-ray diffraction (PXRD) data were collected on a Miniflex II diffractometer using  $\text{Cu-K}\alpha$  radiation ( $\lambda = 1.540598 \text{ \AA}$ ) at 40 kV and 40 mA in the range of  $5^\circ \leq 2\theta \leq 60^\circ$ . The simulated patterns were derived from the Mercury Version 1.4 software (<http://www.ccdc.cam.ac.uk/products/mercury/>). Single crystal X-ray diffraction was carried out by a Rigaku Mercury CCD diffractometer using graphite monochromated with  $\text{Mo-K}\alpha$  radiation ( $\lambda = 0.71073 \text{ \AA}$ ). There was no evidence of crystal decay during data collection. The intensity data sets were collected with the  $\omega$  scan technique and corrected for  $L_p$  effects. The SHG measurement on hand-selected unsieved crystalline sample of **1** was performed on a modified Kurtz-NLO system using 1.06 and 1.94  $\mu\text{m}$  laser radiation, respectively. The SHG signal was collected in a reflection geometry from the excitation surface and focused into a fiber optic bundle. The output of the fiber optic bundle was coupled to the entrance slit of a spectrometer and detected using a CCD detector. Potassium dihydrogen phosphate (KDP) powder was used as a reference to assume the second-order NLO effect. No obvious SHG signals were detected when irradiated by 1.94  $\mu\text{m}$ /1.06  $\mu\text{m}$  laser.

**Table S1** The selected bond distances for **1**<sup>a</sup>.

|              |          |              |          |
|--------------|----------|--------------|----------|
| Cd(1)-O(3)#1 | 2.247(2) | Cd(2)-O(3)   | 2.256(3) |
| Cd(1)-O(3)   | 2.247(2) | Cd(2)-O(3)#4 | 2.301(2) |
| Cd(1)-O(1)#2 | 2.347(3) | Cd(2)-N(3)#5 | 2.313(3) |
| Cd(1)-O(1)#3 | 2.347(3) | Cd(2)-N(1)#6 | 2.362(3) |
| Cd(1)-N(4)#1 | 2.358(3) | Cd(2)-O(1)#3 | 2.455(2) |
| Cd(1)-N(4)   | 2.358(3) | Cd(2)-O(2)#6 | 2.498(2) |

---

<sup>a</sup> Symmetry codes for **1**: (#1)  $-x, -y + 1, z$ ; (#2)  $-x + 1/2, -y + 1, z + 1/2$ ; (#3)  $x - 1/2, y, z + 1/2$ ; (#4)  $x - 1/4, -y + 3/4, z + 1/4$ ; (#5)  $-x - 1/4, y - 1/4, z + 1/4$ ; (#6)  $-x, -y + 1, z + 1$ .

---

**Fig. S1** The 3-D inorganic ths ( $\text{ThSi}_2$ ) top network.

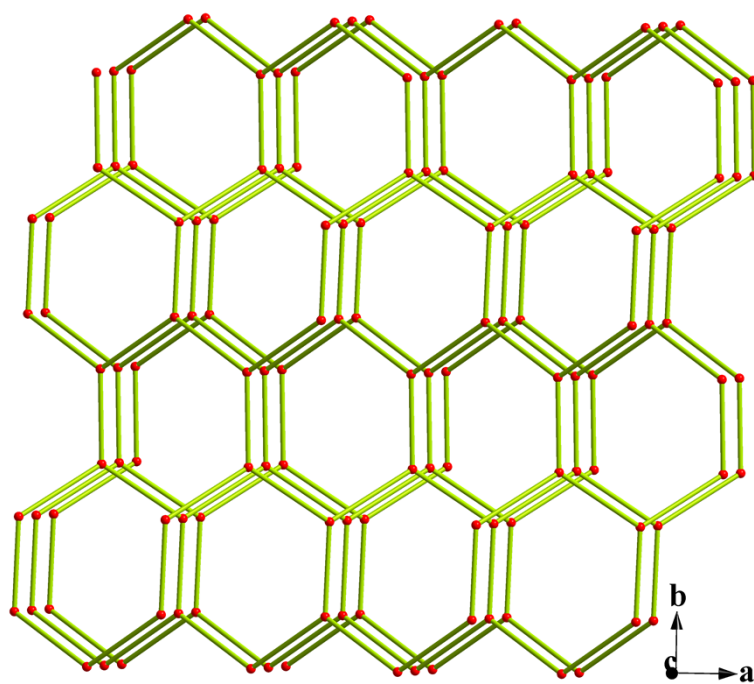

**Fig. S2** The 3-D organic (4,4,6)-connected topology. Green:  $\text{Cd(II)}$ , pink:  $\text{tza}^{2-}$ .

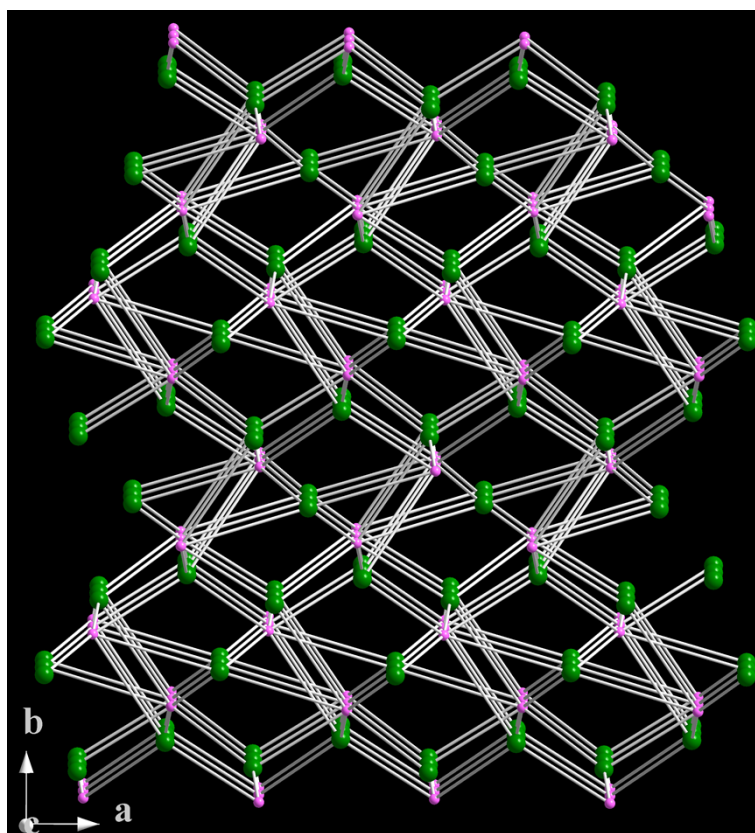

**Fig. S3** (a) The simplified (3,6,6,6-*c*) topological net of **1**; (b, c) View of a right-handed helical chain along with the appearance of  $\mu_6$ -tza<sup>2-</sup> ligands from the *c*-axis and *b*-axis, respectively (the atoms in red, pink and green represent the  $\mu_3$ -OH<sup>-</sup>,  $\mu_6$ -tza<sup>2-</sup> and Cd(II), respectively).

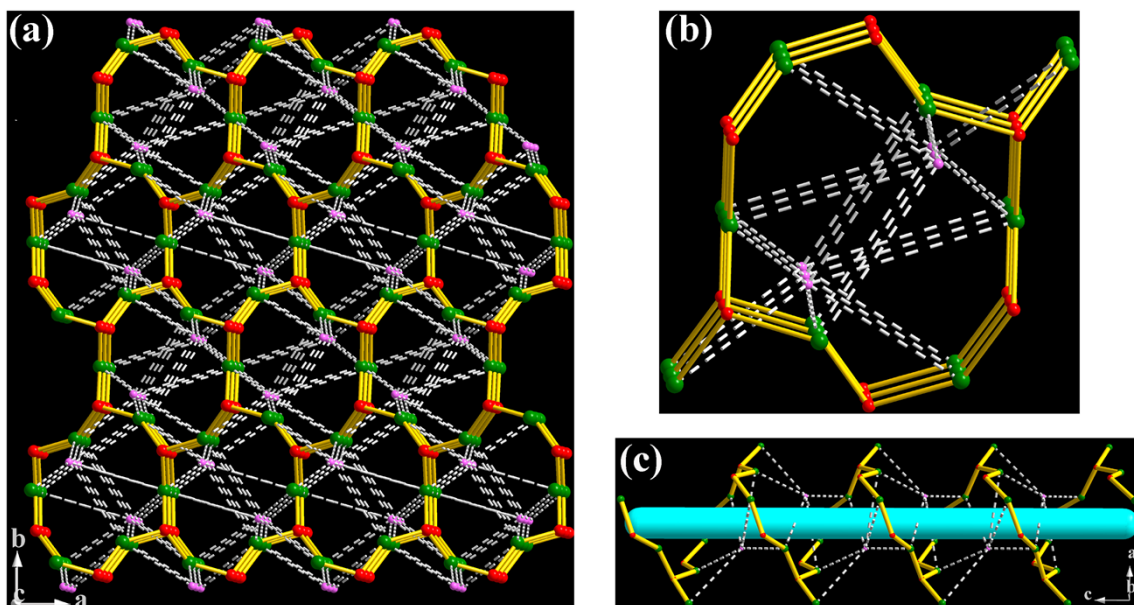

**Fig. S4** Powdered X-ray diffraction (PXRD) patterns of **1**. The black and blue lines represent simulated and experimental results, respectively.

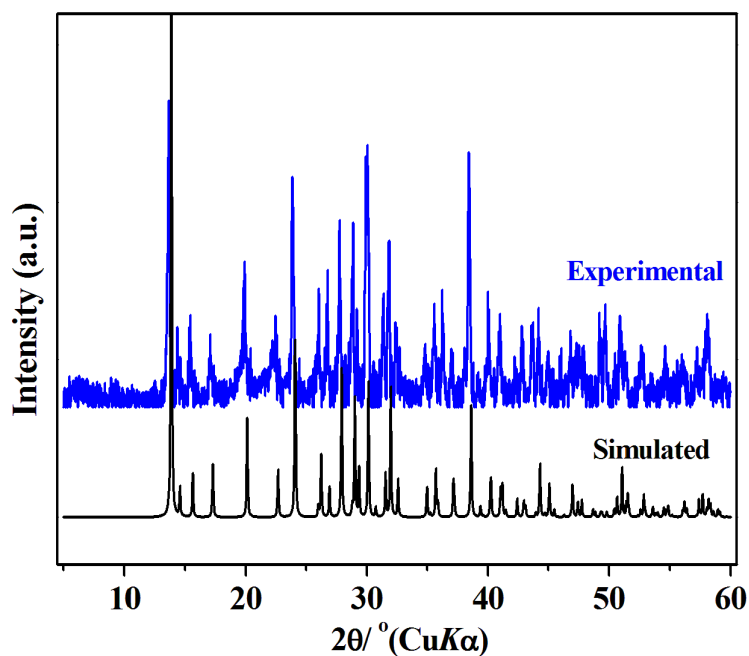

**Fig. S5** View of the TGA curve of **1**.

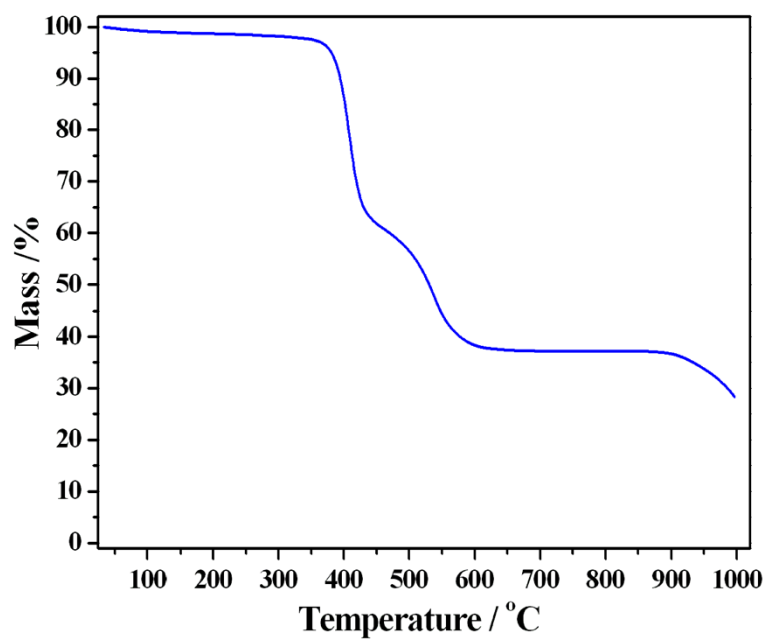

**Fig. S6** The FT-IR spectra of **1**.

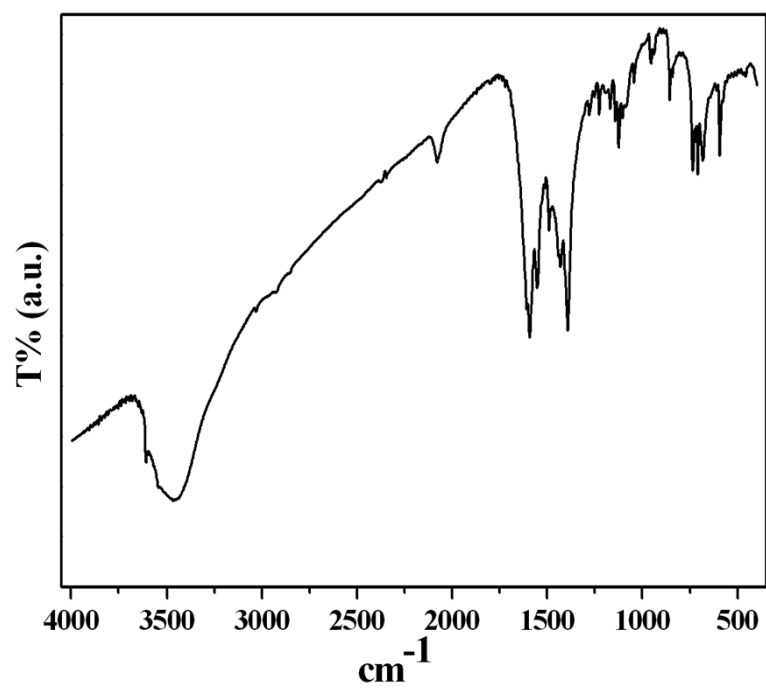

Supplement: c5ce01347j1.pdf [file c5ce01347j1.pdf]
